# Supplementary material
Source: MDPI journal article supplement (https://www.mdpi.com/2079-6412/13/6/1037)
Supplement: s1 [file s1]

# Supplementary Materials: Polypyrrole Nanosheets Prepared by Rapid In Situ Polymerization for NIR-II Photoacoustic-Guided Photothermal Tumor Therapy

Yixin Xie <sup>1,†</sup>, Ji Xu <sup>1,†</sup>, Hui Jin <sup>1,†</sup>, Yunfeng Yi <sup>2</sup>, Yuqing Shen <sup>3</sup>, Xiuming Zhang <sup>1</sup>, Xinxin Liu <sup>1</sup>, Yanan Sun <sup>1</sup>, Wei Shi <sup>1,\*</sup>, Yuan He <sup>2,\*</sup> and Dongtao Ge <sup>1,\*</sup>

<sup>1</sup> The Higher Educational Key Laboratory for Biomedical Engineering of Fujian Province, Research Center of Biomedical Engineering of Xiamen, Fujian Key Laboratory of Surface and Interface Engineering for High Performance Materials, Department of Biomaterials, College of Materials, Xiamen University, Xiamen 361001, China; 20720201150140@stu.xmu.edu.cn (Y.X.); 31420191150146@stu.xmu.edu.cn (J.X.); 31420181150116@stu.xmu.edu.cn (H.J.); sunyanan@xmu.edu.cn (Y.S.); zhangxiuming@xmu.edu.cn (X.Z.); liuxinxin@xmu.edu.cn (X.L.)

<sup>2</sup> Department of Cardiothoracic Surgery, The 909th Hospital, School of Medicine, Xiamen University, Zhangzhou 363000, China; yyfeng.dor1969@163.com

<sup>3</sup> Transfusion Department, Woman and Children's Hospital, School of Medicine, Xiamen University, Xiamen 361001, China; syuqing@163.com

\* Correspondence: Correspondence: shiwei@xmu.edu.cn (W.S.); heyuan\_1988@126.com (Y.H.); gedt@xmu.edu.cn (D.G.)

† These authors contributed equally to this work.

## Calculation of Photothermal Conversion Efficiency

The photothermal conversion efficiency of PPY NSs aqueous solution (100 µg/mL) was calculated using a circular quartz colorimetric dish with a diameter of 1 cm<sup>2</sup>. The calculation formula of photothermal conversion efficiency ( $\eta$ ) is:

$$\eta = \frac{hS(T_{max} - T_{surr}) - Q_s}{I(1 - 10^{-A})} \quad (\text{Eq 1})$$

Where  $h$  is the heat transfer coefficient, and  $S$  is surface area of laser irradiation area.  $T_{max}$  is the highest steady-state temperature of nanoplates irradiated at 808/1064 nm laser, which are 58.1 °C and 62.1 °C respectively.  $T_{surr}$  (25 °C) is ambient temperature.  $Q_s$  represents the heat emitted from the light absorbed by the quartz sample cell itself. Using a quartz cuvette cell containing same volume of ultrapure water without any PPY nanosheets, the independently measured heat is 17.64 mW.  $I$  (1 W) is laser power.  $A_{808/1064}$  is the absorbance (1.05/1.06) of PPY NSs at 808/1064 nm.

Calculate  $hS$  according to the following formula:

$$hS = \frac{m_s C_s}{\tau_s} \quad (\text{Eq 2})$$

$$\tau_s = -\frac{t}{\ln \theta} \quad (\text{Eq 3})$$

$$\theta = \frac{T - T_{surr}}{T_{max} - T_{surr}} \quad (\text{Eq 4})$$

$m_s$  (1 g) and  $C_s$  (4.2 J/g) are the mass and specific heat capacity of the solvent.  $T$  is PPY nanosheets temperature during cooling.  $\tau_s$  is the sample system time constant. The temperature cooling time is fitted with a linear curve, and it can be determined to be 253.4/251.2 s at 808/1064 nm. Therefore, the 808/1064 nm laser heat conversion efficiency ( $\eta$ ) of PPY NSs can be calculated to be 58.27%/66.01%.

**Citation:** Xie, Y.; Xu, J.; Jin, H.; Yi, Y.; Shen, Y.; Zhang, X.; Liu, X.; Sun, Y.; Shi, W.; He, Y.; et al. Polypyrrole Nanosheets Prepared by Rapid In Situ Polymerization for NIR-II Photoacoustic-Guided Photothermal Tumor Therapy. *Coatings* **2023**, *13*, x. <https://doi.org/10.3390/xxxxx>

Academic Editor: Arūnas Ramanavičius

Received: 7 May 2023

Revised: 29 May 2023

Accepted: 31 May 2023

Published: 2 June 2023

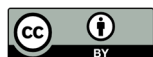

**Copyright:** © 2023 by the authors. Submitted for possible open access publication under the terms and conditions of the Creative Commons Attribution (CC BY) license (<https://creativecommons.org/licenses/by/4.0/>).

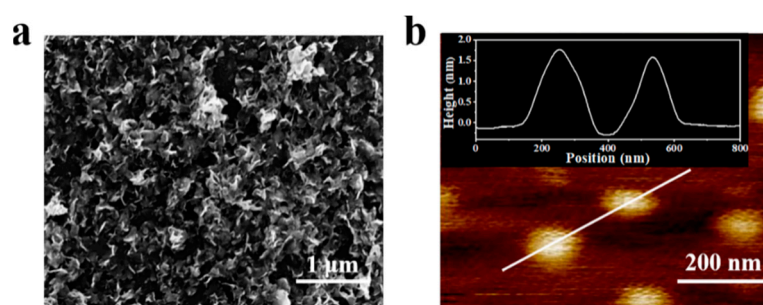

**Figure S1.** SEM (a) and AFM (b) images of MnO<sub>2</sub> NSs.

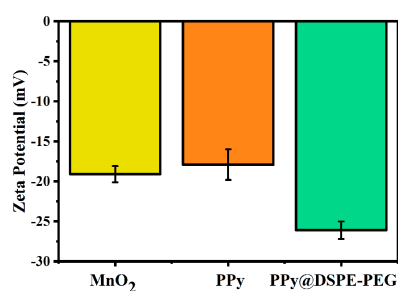

**Figure S2.** Zeta potential of MnO<sub>2</sub> NSs, PPy NSs and PPy@DSPE-PEG NSs.

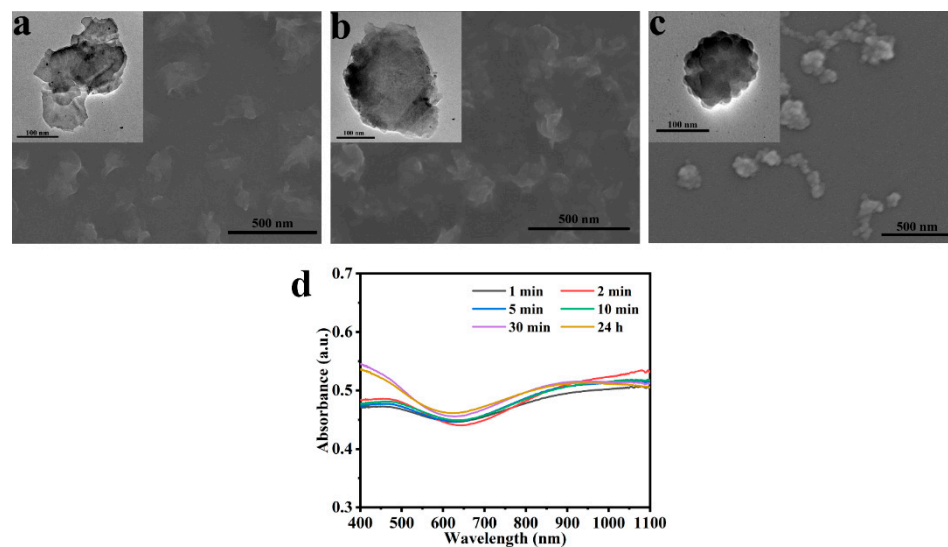

**Figure S3.** Morphology of PPy NSs reacted with different time (a) 2 min, (b) 30 min, (c) 24 h detected by SEM and TEM (insert pictures). (d) UV-Vis-NIR absorption spectra of PPy NSs under different synthetic time.

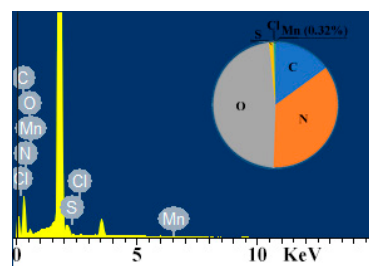

**Figure S4.** EDS spectrum of PPy NSs.

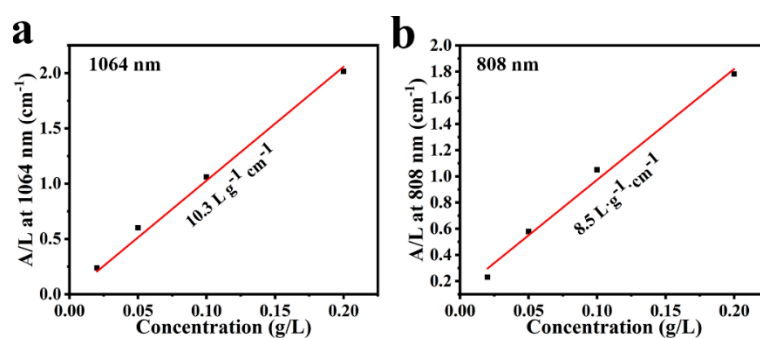

Figure S5. Extinction coefficient of PPy NSs under 1064 nm (a) and 808 nm (b) laser irradiation.

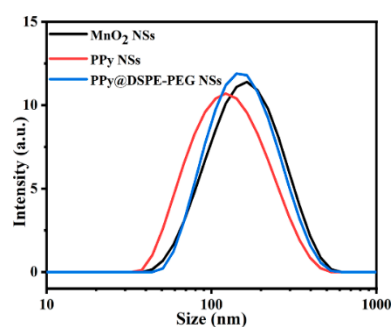

Figure S6. DLS profiles of  $\text{MnO}_2$  NSs, PPy NSs and PPy@DSPE-PEG NSs.

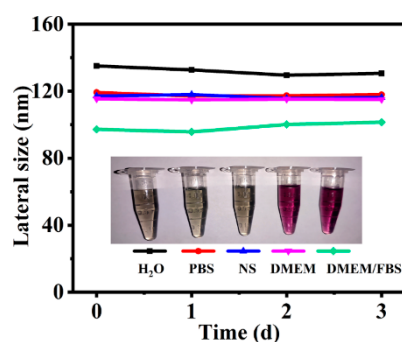

Figure S7. DLS profiles of PPy@DSPE-PEG NSs in different buffer solutions.

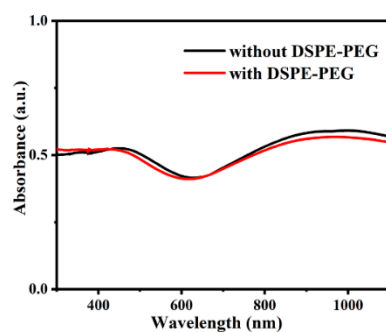

Figure S8. UV-Vis-NIR absorption spectra of PPy NSs with and without DSPE-PEG.

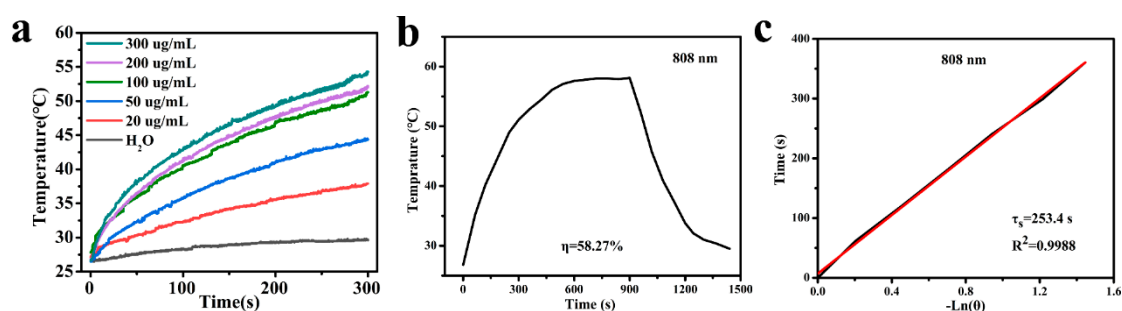

**Figure S9.** (a) Photothermal heating curves of PPy@DSPE-PEG NSs with different concentrations under 808 nm laser irradiation ( $1 \text{ W/cm}^2$ , 5 min). (b) Photothermal heating and cooling curves of PPy@DSPE-PEG NSs ( $100 \text{ µg/mL}$ ) under 808 nm and (c) the time constant for heat transfer from the system using a linear regression of the cooling profile.

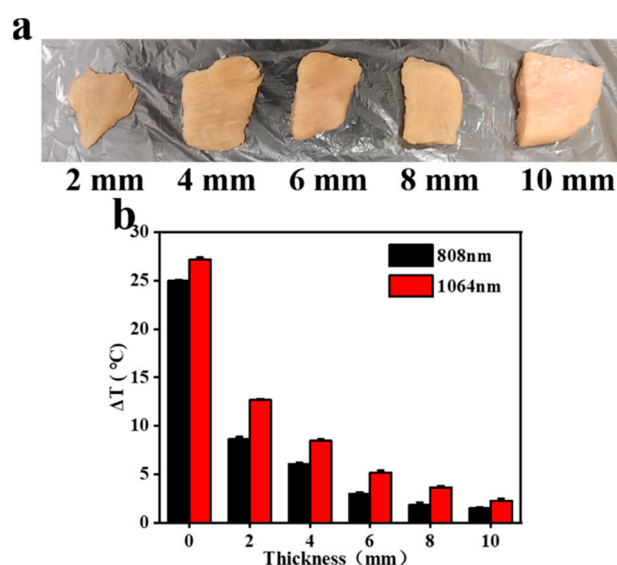

**Figure S10.** (a) Different thickness chicken breast pictures. (b) The temperature change values of PPy@DSPE-PEG NSs ( $100 \text{ µg/mL}$ ) irradiated with 808 nm/1064 nm laser irradiation ( $1 \text{ W/cm}^2$ , 5 min) under different thickness of covered skin.

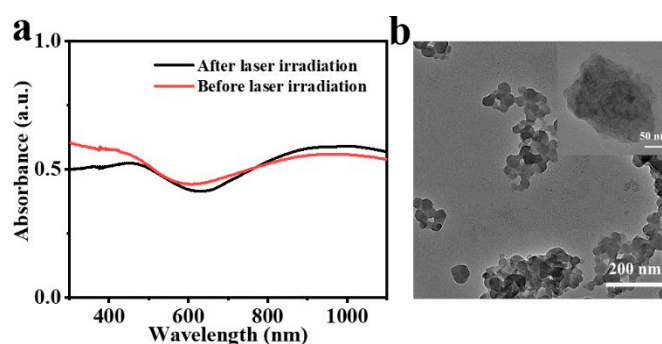

**Figure S11.** (a) UV-Vis-NIR absorption spectra of PPy@DSPE-PEG NSs before and after laser irradiation. (b) TEM image of PPy NSs after 5-cycles laser irradiation.

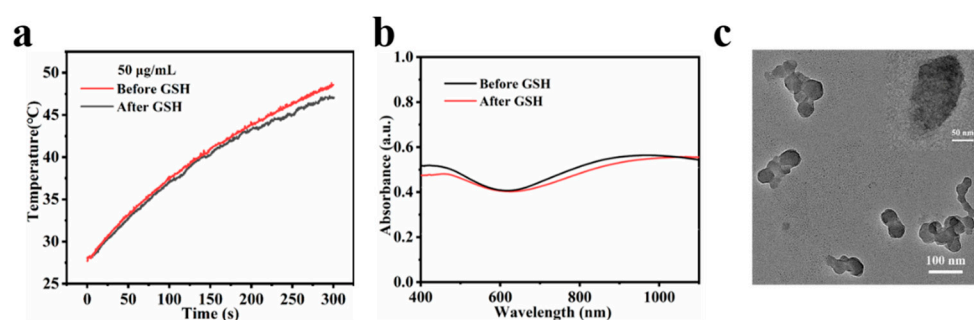

**Figure S12.** (a) Photothermal heating curves of PPy@DSPE-PEG NSs soaked and un-soaked in the simulated solution of tumor environment (PBS with 5 mM GSH, pH = 5.0) under 1064 nm laser irradiation. (b) UV-Vis-NIR absorption spectra of PPy@DSPE-PEG NSs before and after soaked in tumor microenvironment simulation fluid. (c) TEM image of PPy NSs after soaked in the simulated solution of tumor environment.

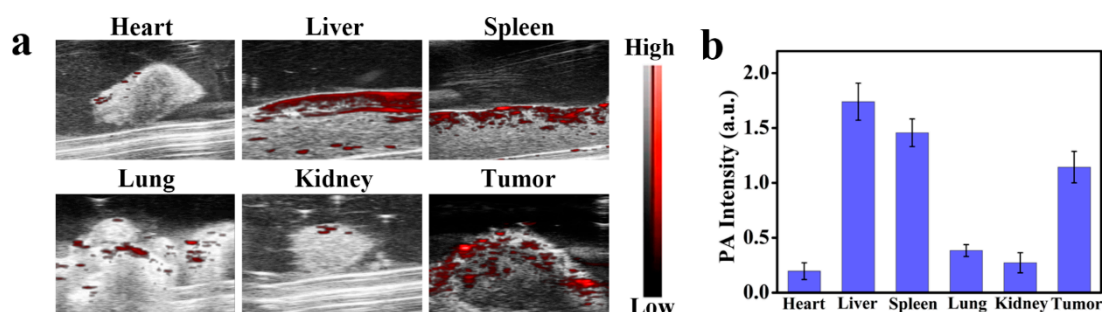

**Figure S13.** Pseudo-color pictures (a) and intensity (b) of photoacoustic signal intensity in major organs and tumor tissues after 24 h injection of PPy@DSPE-PEG NSs (4 mg/kg).

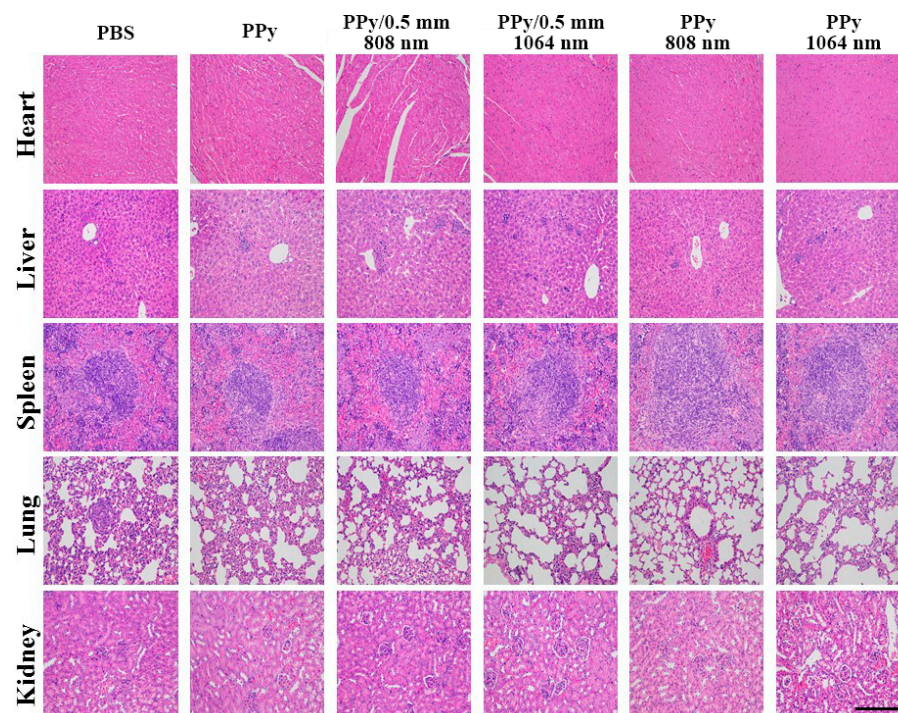

**Figure S14.** H&E staining images of heart, liver, spleen, lung and kidney at the end of the treatment cycle (14 day). (Scale bar = 200 μm).
